# Supplementary material for: Real-time monitoring of the column chromatographic process of Phellodendri Chinensis Cortex part I: end-point determination based on near-infrared spectroscopy combined with machine learning
Source: Royal Society of Chemistry journal article supplement (doi:10.1039/d2nj01291j), 2022-01-01
Supplement: d2nj01291j1.pdf [file d2nj01291j1.pdf]

## Supplementary data

**Real-time monitoring of the column chromatographic process of  
*Phellodendri Chinensis Cortex* Part I: End-point determination based  
on near-infrared spectroscopy combined with machine learning**

Sijun Wu<sup>a</sup>, Tongcan Cui<sup>a</sup>, Zheng Li<sup>a</sup>, Ming Yang<sup>b</sup>, Zhenzhong Zang<sup>b,\*</sup>, Wenlong Li<sup>1,\*</sup>

<sup>a</sup>College of Pharmaceutical Engineering of Traditional Chinese Medicine, Tianjin University of Traditional Chinese Medicine, Tianjin, 301617, PR China;

<sup>b</sup>Key Laboratory of Modern Preparation of Traditional Chinese Medicine, Ministry of Education, Jiangxi University of Traditional Chinese Medicine, Nanchang, 330004, P R China

---

**Corresponding authors.**

Email: [wshlwl@tjutcm.edu.cn](mailto:wshlwl@tjutcm.edu.cn) (W. Li), [Zangzhenzhongvip@163.com](mailto:Zangzhenzhongvip@163.com) (Z. Zang)

**Table S1** Results of the raw data using different preprocessing method

| Pretreatment method                         | Berberine hydrochloride |                   | Phellodendrine chloride |                   | Total alkaloids |                   |
|---------------------------------------------|-------------------------|-------------------|-------------------------|-------------------|-----------------|-------------------|
|                                             | PCs                     | RMSECV<br>(mg/mL) | PCs                     | RMSECV<br>(mg/mL) | PCs             | RMSECV<br>(mg/mL) |
| Raw spectra                                 | 13                      | 0.0788            | 11                      | 0.2439            | 12              | 0.0767            |
| MSC                                         | 11                      | 0.0779            | 13                      | 0.2385            | 11              | 0.0672            |
| SNV                                         | 11                      | 0.0752            | 12                      | 0.2351            | 13              | 0.0557            |
| 1 <sup>st</sup> derivative                  | 13                      | 0.1588            | 9                       | 0.2837            | 7               | 0.1975            |
| 2 <sup>nd</sup> derivative                  | 4                       | 0.2166            | 3                       | 0.3299            | 4               | 0.2364            |
| Savitzky–Golay                              | 10                      | 0.0976            | 8                       | 0.2755            | 11              | 0.0739            |
| SNV+ Savitzky–Golay                         | 13                      | 0.0670            | 10                      | 0.2457            | 12              | 0.0546            |
| 1 <sup>st</sup> derivative + Savitzky–Golay | 11                      | 0.1510            | 9                       | 0.2791            | 7               | 0.1954            |
| SNV+1 <sup>st</sup> derivative              | 7                       | 0.1706            | 8                       | 0.2695            | 14              | 0.1407            |

**Table S2** Results of the selected variables data by SPA using different preprocessing methods

| Pretreatment method                         | Berberine hydrochloride |                   | Phellodendrine chloride |                   | Total alkaloids |                   |
|---------------------------------------------|-------------------------|-------------------|-------------------------|-------------------|-----------------|-------------------|
|                                             | PCs                     | RMSECV<br>(mg/mL) | PCs                     | RMSECV<br>(mg/mL) | PCs             | RMSECV<br>(mg/mL) |
| Raw spectra                                 | 13                      | 0.1091            | 7                       | 0.3455            | 11              | 0.1211            |
| MSC                                         | 10                      | 0.1098            | 5                       | 0.3030            | 9               | 0.1211            |
| SNV                                         | 10                      | 0.1145            | 6                       | 0.3013            | 12              | 0.1204            |
| 1 <sup>st</sup> derivative                  | 12                      | 0.1342            | 3                       | 0.4256            | 12              | 0.1569            |
| 2 <sup>nd</sup> derivative                  | 10                      | 0.1372            | 3                       | 0.3733            | 10              | 0.1679            |
| Savitzky–Golay                              | 8                       | 0.1590            | 3                       | 0.4164            | 9               | 0.1705            |
| SNV+ Savitzky–Golay                         | 10                      | 0.1455            | 3                       | 0.3282            | 11              | 0.1904            |
| 1 <sup>st</sup> derivative + Savitzky–Golay | 7                       | 0.1656            | 2                       | 0.4082            | 10              | 0.1731            |
| SNV+1 <sup>st</sup> derivative              | 12                      | 0.1344            | 3                       | 0.3593            | 7               | 0.1812            |

**Table S3** Results of selected variables data by UVE after different pretreatment methods for the target compounds

| Pretreatment method                         | Berberine hydrochloride |                   | Phellodendrine chloride |                   | Total alkaloids |                   |
|---------------------------------------------|-------------------------|-------------------|-------------------------|-------------------|-----------------|-------------------|
|                                             | PCs                     | RMSECV<br>(mg/mL) | PCs                     | RMSECV<br>(mg/mL) | PCs             | RMSECV<br>(mg/mL) |
| Raw spectra                                 | 13                      | 0.1409            | 8                       | 0.2892            | 10              | 0.1379            |
| MSC                                         | 8                       | 0.1335            | 8                       | 0.2862            | 9               | 0.1461            |
| SNV                                         | 9                       | 0.1344            | 7                       | 0.2930            | 9               | 0.1183            |
| 1 <sup>st</sup> derivative                  | 10                      | 0.1380            | 6                       | 0.2967            | 10              | 0.1488            |
| 2 <sup>nd</sup> derivative                  | 13                      | 0.1478            | 9                       | 0.3015            | 12              | 0.1770            |
| Savitzky–Golay                              | 12                      | 0.1528            | 9                       | 0.2887            | 9               | 0.1497            |
| SNV+ Savitzky–Golay                         | 11                      | 0.1573            | 8                       | 0.2905            | 10              | 0.1240            |
| 1 <sup>st</sup> derivative + Savitzky–Golay | 13                      | 0.1536            | 11                      | 0.3119            | 9               | 0.1662            |
| SNV+1 <sup>st</sup> derivative              | 14                      | 0.1500            | 9                       | 0.2928            | 11              | 0.1227            |

**Table S4** Results of selected variables data by CARS after different pretreatment methods for the target compounds

| Pretreatment method                         | Berberine hydrochloride |                   | Phellodendrine chloride |                   | Total alkaloids |                   |
|---------------------------------------------|-------------------------|-------------------|-------------------------|-------------------|-----------------|-------------------|
|                                             | PCs                     | RMSECV<br>(mg/mL) | PCs                     | RMSECV<br>(mg/mL) | PCs             | RMSECV<br>(mg/mL) |
| Raw spectra                                 | 11                      | 0.0614            | 10                      | 0.3053            | 11              | 0.0520            |
| MSC                                         | 8                       | 0.0676            | 7                       | 0.2817            | 10              | 0.0528            |
| SNV                                         | 9                       | 0.0650            | 8                       | 0.2791            | 11              | 0.0498            |
| 1 <sup>st</sup> derivative                  | 11                      | 0.0793            | 5                       | 0.3429            | 14              | 0.0702            |
| 2 <sup>nd</sup> derivative                  | 10                      | 0.1324            | 4                       | 0.3458            | 12              | 0.1087            |
| Savitzky–Golay                              | 11                      | 0.0914            | 5                       | 0.3004            | 13              | 0.0625            |
| SNV+ Savitzky–Golay                         | 11                      | 0.0655            | 4                       | 0.3006            | 13              | 0.0522            |
| 1 <sup>st</sup> derivative + Savitzky–Golay | 10                      | 0.0715            | 5                       | 0.3094            | 10              | 0.0769            |
| SNV+1 <sup>st</sup> derivative              | 13                      | 0.0714            | 4                       | 0.3079            | 9               | 0.0899            |
